# Supplementary material for: Positive side effects of Ca antagonists for osteoarthritic joints—results of an in vivo pilot study
Source: PubMed Central journal article supplement (PMC4296554; doi:10.1186/s13018-014-0138-8), 2015-01-09
Supplement: 13018_2014_138_MOESM1_ESM.pdf [file 13018_2014_138_MOESM1_ESM.pdf]

## Index of Severity for Osteoarthritis of the Knee by Lequesne et al

Overview:

Lequesne et al developed an index of severity for osteoarthritis for the knee (ISK). This can be used to assess the effectiveness of therapeutic interventions.

Sections for index:

(1) pain or discomfort

(2) maximum distance walked

(3) activities of daily living

### I Pain or Discomfort

| Parameter                                                            | Finding                                  | Points |
|----------------------------------------------------------------------|------------------------------------------|--------|
| pain or discomfort during nocturnal bedrest                          | none                                     | 0      |
|                                                                      | only on movement or in certain positions | 1      |
|                                                                      | without movement                         | 2      |
| duration of morning stiffness or pain after getting up               | none                                     | 0      |
|                                                                      | < 15 minutes                             | 1      |
|                                                                      | >= 15 minutes                            | 2      |
| remaining standing for 30 minutes increases pain                     | no                                       | 0      |
|                                                                      | yes                                      | 1      |
| pain on walking                                                      | none                                     | 0      |
|                                                                      | only after walking some distance         | 1      |
|                                                                      | early after starting                     | 2      |
| pain or discomfort after getting up from sitting without use of arms | no                                       | 0      |
|                                                                      | yes                                      | 1      |

where:

- A change in a 1991 version was to have the duration of morning stiffness scored 0 if it was 1 minute or less and 1 if it was from 1 to less than 15 minutes.
- Pain on walking in a 1991 version expanded "early after starting" to "after initial ambulation and increasingly with continued ambulation"

## II. Maximum Distance Walked

| <b>Parameter</b>        | <b>Finding</b>                              | <b>Points</b> |
|-------------------------|---------------------------------------------|---------------|
| maximum distance walked | unlimited                                   | 0             |
|                         | > 1 kilometer but limited                   | 1             |
|                         | about 1 kilometer (about 15 minutes)        | 2             |
|                         | about 500 - 900 meters (about 8-15 minutes) | 3             |
|                         | from 300 - 500 meters                       | 4             |
|                         | from 100 - 300 meters                       | 5             |
| walking aids required   | < 100 meters                                | 6             |
|                         | None                                        | 0             |
|                         | 1 walking stick or crutch                   | 1             |
|                         | 2 walking sticks or crutches                | 2             |

## III. Activities of Daily Living

| <b>Parameter</b>                               | <b>Finding</b>           | <b>Points</b> |
|------------------------------------------------|--------------------------|---------------|
| able to climb up a standard flight of stairs   | easily                   | 0             |
|                                                | with mild difficulty     | 0.5           |
|                                                | with moderate difficulty | 1.0           |
|                                                | with marked difficulty   | 1.5           |
|                                                | impossible               | 2.0           |
| able to clumb down a standard flight of stairs | easily                   | 0             |
|                                                | with mild difficulty     | 0.5           |
|                                                | with moderate difficulty | 1.0           |
|                                                | with marked difficulty   | 1.5           |
|                                                | impossible               | 2.0           |
| able to squat or bend at the knee              | easily                   | 0             |
|                                                | with mild difficulty     | 0.5           |
|                                                | with moderate difficulty | 1.0           |
|                                                | with marked difficulty   | 1.5           |
|                                                | impossible               | 2.0           |
| able to walk on uneven ground                  | easily                   | 0             |

|  |                          |     |
|--|--------------------------|-----|
|  | with mild difficulty     | 0.5 |
|  | with moderate difficulty | 1.0 |
|  | with marked difficulty   | 1.5 |
|  | impossible               | 2.0 |

index of severity =

= SUM(points for all parameters)

Interpretation:

- minimum points for each section: 0
- maximum points for each section: 8
- minimum index score: 0
- maximum index score: 24

| Index Score | Handicap         |
|-------------|------------------|
| 0           | none             |
| 1 - 4       | mild             |
| 5 - 7       | moderate         |
| 8 - 10      | severe           |
| 11 - 13     | very severe      |
| >= 14       | extremely severe |

#### Modifications

The index was modified in 1997 with some minor changes to morning stiffness and termed the "algofunctional index".

References:

Lequesne M Mery C et al. Indexes of severity for osteoarthritis of the hip and knee. Scand J Rheumatology. 1987; Supplement 65: 85-89.

Lequesne M. Indices of severity and disease activity for osteoarthritis. Seminars in Arthritis and Rheumatism. 1991; 20 (supplement 2): 48-54.

Lequesne MG. The algofunctional indices for hip and knee osteoarthritis. J Rheumatol. 1997; 24: 779-781.
